## Normal values for native T1 at 1.5T in the pericardial fluid of healthy volunteers

Simon Thalén MD<sup>1</sup>, Joao G Ramos MD PhD<sup>1</sup>, Henrik Engblom MD PhD<sup>1</sup>,  
Andreas Sigfridsson PhD<sup>1</sup>, Peder Sörensson MD PhD<sup>2</sup>, Martin Ugander MD PhD<sup>1,3,\*</sup>

<sup>1</sup>Department of Clinical Physiology, Karolinska University Hospital, and Karolinska Institutet, Stockholm, Sweden.

<sup>2</sup>Department of Cardiology, Karolinska University Hospital, Stockholm, Sweden.

<sup>3</sup>Kolling Institute, Royal North Shore Hospital, and Charles Perkins Centre, University of Sydney, Sydney, Australia.

\*Corresponding author.

## **Abstract**

**Background:** T1 mapping cardiovascular magnetic resonance (CMR) imaging has been used to characterize pericardial effusions. The aim of this study was to measure pericardial fluid native T1 values in healthy volunteers to establish normal values.

**Methods:** Prospectively recruited volunteers (n=30) underwent CMR at 1.5T and native T1 maps were acquired using a MOLLI 5s(3s)3s acquisition scheme. A volume of pericardial fluid was imaged in a short-axis slice and in a slice perpendicular to the short-axis orientation. A reliable measurement had a region of interest size  $>10 \text{ mm}^2$ , coefficient of variation  $<10 \%$ , and a relative difference  $<5 \%$  between the two slice orientations.

**Results:** In 26/30 (87%) of volunteers, there was a sufficient amount of pericardial fluid to enable reliable measurement. Native T1 of pericardial fluid was  $3262 \pm 163$  (95% normal limits 2943–3581ms), and did not differ in the perpendicular slice orientation ( $3267 \pm 173$  ms,  $p=0.75$ ), due to sex (female  $3311 \pm 177$  vs. male  $3220 \pm 142$  ms,  $p=0.17$ ), or age ( $R^2=0.07$ ,  $p=0.2$ )

**Conclusions:** This study shows that T1 values can be reliably measured in the pericardial fluid of healthy volunteers. It is the first to report normal reference ranges for T1 values at 1.5T in the pericardial fluid of healthy volunteers.

## Introduction

Pericardial fluid is a serous ultrafiltrate of plasma normally present between the layers of the pericardium enveloping the heart. An increase in the amount of fluid above approximately 30-35 ml is considered a pericardial effusion [1]. Pericardial effusions can have a wide variety of etiologies, and are a common clinical occurrence. The diagnostic approach includes categorizing the effusion as transudative, due to an imbalance in osmotic and hydrostatic pressures, or exudative, due to an increase in permeability of the pericardium secondary to local inflammation. Biochemical analysis may be performed and interpreted using the Light criteria, originally developed and validated for assessing pleural effusions [2].

With the rapid development of new techniques in cardiovascular magnetic resonance imaging (CMR) there have been several attempts to non-invasively characterize effusion fluids. Early attempts using magnetic field strengths below one tesla were largely unremarkable [3–7]. Later results using diffusion-weighted imaging have shown some promise, but also conflicting results [8–11].

T1-mapping, a technique whereby the T1 value is quantified by imaging on a pixel-by-pixel basis, has now largely superseded the previous T1-weighted methods where the T1 value was encoded into arbitrary signal intensities and only indirectly estimated. T1-mapping CMR has enabled the characterization of focal and global cardiovascular pathologies, and made it possible to reliably and quantitatively perform longitudinal and group comparisons [12].

Non-contrast (native) T1 mapping has successfully been used to classify pericardial and pleural effusions as transudate or exudate [13], and has further been used to successfully differentiate between malignant and non-malignant pleural and ascitic effusions *ex vivo* [14]. The rationale for these approaches is that proteins and cells leaking through a permeable inflamed pericardium and into the pericardial fluid have paramagnetic properties that lower

the T1 value of the effusion fluid. Consequently, a low native T1 value would be consistent with an exudate and a high value with a transudate.

The current study aimed to measure T1 in pericardial fluid in healthy volunteers by determining the feasibility of these measurements and establishing normal values.

## **Methods**

### **Volunteers**

Healthy volunteers (n=30) were recruited. Exclusion criteria were any known cardiovascular pathology or metallic implants not safe for MRI.

### **Image acquisition**

T1 maps were acquired at end diastole using a modified look-locker inversion recovery (MOLLI) sequence [16] at 1.5T (MAGNETOM Aera, Siemens Healthcare, Erlangen, Germany) using motion-correction [17]. A 5s(3s)3s acquisition scheme where two inversions were made and images acquired once per heartbeat during five seconds after the first inversion, followed by a three-second pause, and images acquired once per heartbeat during three seconds after the second inversion [18]. Typical image acquisition parameters were: flip angle 35°, matrix size 256 × 136–158, slice thickness 8 mm, initial inversion time 129 ms, field of view 300-410 × 241–384 mm<sup>2</sup>, parallel imaging factor 2.

A short-axis (SA) stack of T1-maps encompassing the heart and the ascending aorta was acquired and screened for the presence of pericardial fluid visible as areas with native T1 values above 2500 ms. A slice perpendicular (P) to the short-axis (SA) slice was then prescribed to enable two perpendicular measurements.

### **Image analysis**

Image analysis was performed on clinical workstations using clinical imaging software (syngo.via VB30A; Siemens Healthcare GmbH, Erlangen, Germany). Regions of interest (ROI) were manually prescribed in the same volume of pericardial fluid of both the SA and P slices. A three-dimensional cursor feature was used to ensure measurement in the same volume of pericardial fluid in both slice orientations.

To evaluate measurement reliability, the following criteria were used to define a reliable measurement: 1) the ROI size needed to be greater than 10 mm<sup>2</sup>, 2) the coefficient of variation of measured values within the ROI needed to be less than 10%, and 3) the relative difference in measured values between the SA and P slice orientations needed to be below 5%. The coefficient of variation was defined as the ratio of the standard deviation to the mean. The relative difference in native T1 between SA and P measurements was defined as  $|SA-P| / [(SA+P)/2]$ .

### **Statistical analysis**

The normality of distributions was assessed both visually using Q-Q plots and the Shapiro-Wilks test and data reported as median [interquartile range] or mean±SD as appropriate. Mean value comparisons were made using parametric paired or unpaired t-tests as appropriate. A p-value of less than 0.05 was considered statistically significant. Normal reference ranges were calculated as mean ± 1.96\*standard deviation. Statistical calculations were performed using the software package R (R Core Team 2020, Vienna, Austria).

### **Results**

The healthy volunteers averaged 35 (range 20–61) years of age, 14 (46 %) were female and 26/30 (87 %) had a sufficient amount of pericardial fluid to enable reliable

measurement. The characteristics of the volunteers are shown in table 1 and an example T1 map from one volunteer is shown in figure 1.

Native T1 of pericardial fluid was  $3262 \pm 163$  (95% normal limits 2943–3581ms), and did not differ in the perpendicular slice orientation ( $3267 \pm 173$  ms,  $p=0.75$ ). Native T1 of pericardial fluid did not differ due to sex (female  $3311 \pm 177$  vs. male  $3220 \pm 142$  ms,  $p=0.17$ ), age ( $R^2=0.07$ ,  $p=0.2$ ) or heart rate ( $R^2=0.07$ ,  $p=0.18$ ).

## Discussion

This study shows that T1 values can be reliably measured in the pericardial fluid of healthy volunteers. It is the first to report normal reference ranges for T1 values in the pericardial fluid of healthy volunteers. Normal values are of importance as the pericardial fluid of healthy volunteers is usually not available for biochemical analysis.

The native T1 values of the pericardial fluid in the healthy volunteers in the present study are comparable to native T1 values in pericardial effusions presumed to be transudate [13]. When applying the native T1 cut-off value proposed for exudates in that study (3105 ms), two healthy volunteers from the present study had a lower value.

In one study, 0.6 % of CMR exams were found to have incidental findings of clinically significant pericardial effusion [19]. A non-invasive alternative to diagnostic pericardiocentesis would have clinical significance as all invasive procedures involve some degree of risk. International guidelines recommend pericardiocentesis with biochemical testing upon suspicion of bacterial or neoplastic pericardial effusion [20]. A non-invasive method for characterizing pericardial fluid as transudate, and hence not of bacterial or neoplastic etiology, could then be used to avoid unnecessary diagnostic pericardiocentesis. If on the other hand a pericardial effusion is characterized as an exudate, CMR imaging

provides detailed anatomical information highly relevant to the pericardiocentesis procedure itself.

## **Limitations**

A potential limitation of the current study is the size of ROI required to measure the small volumes of normal pericardial fluid present in healthy volunteers. The matrix size, field of view and slice thickness used in this study are equal to those in routine clinical use and translate to voxel dimensions of approximately  $1.5 \times 1.5 \times 6$  mm or  $13.5$  mm<sup>3</sup>. The median ROI size of  $18$  mm<sup>2</sup> translates to 8 in-plane voxels, or image pixels, per ROI whereas international CMR consensus guidelines recommend avoiding ROI sizes below 20 image pixels for T1 mapping of the myocardium [21]. Even though some partial volume is inevitable, we attempted to overcome this limitation by employing a minimum ROI size criteria, a within-ROI variance criteria, and a between-ROI variance criteria with separately acquired and perpendicularly oriented measurements. There are currently no studies or guidelines available to inform the choice, or specific values, of the above criteria for measurements of T1 in pericardial fluid. They were chosen for purposes of consistency based on clinical judgement.

The sequence used in this study was the 5s(3s)3s variant of MOLLI. Although, other cardiac T1 mapping sequences are available such as SASHA [22], shMOLLI [23], SAPPHIRE [24] among others, MOLLI was chosen as it is the cardiac T1 mapping sequence most widely used clinically. The 5(3)3 variant of MOLLI sequence has been shown to be heart-rate dependent, while the 5s(3s)3s is an improvement, some remaining heart rate dependence is to be expected [25]. The error introduced at high heart rates is due to incomplete relaxation and residual longitudinal magnetization at the time of the next inversion, leading to a lower measured T1 value. The amount of residual longitudinal

magnetization is not only increased at high heart rates but also at higher T1 values. Notably, the native T1 values for pericardial fluid in the current study did not vary with heart rate. The T1 values of the pericardial fluid of healthy volunteers measured in this study are considerably higher than the proposed validated range for measuring native T1 (below 1200 ms) [25]. An underestimation in T1 values is thus to be expected, and the normal values presented in this study should not be generalized beyond the specific 5s(3s)3s variant of the MOLLI sequence. To our knowledge there are no simulation, phantom or volunteer studies that investigate the accuracy and precision of cardiac T1 mapping sequences for the higher T1 values of serous fluids.

## **Conclusions**

T1 can be reliably measured at 1.5T in a normal volume of pericardial fluid in healthy volunteers, and normal reference values are presented. The use of native T1 mapping to characterize pericardial fluid is currently in its infancy and further research is required to determine the value of this approach. The precision and accuracy of specific cardiac T1 mapping sequences for measurement of the higher T1 values of serous fluids is an open question.

## **Declarations**

### **Ethics approval and consent to participate**

The study was approved by the Swedish Ethical Review Authority (application number 2011/1077-31/3) and conducted according to the principles of the Declaration of Helsinki. All participants were enrolled following written informed consent.

### **Consent for publication**



Written informed consent was obtained from patients for publication of their individual details on a group level and anonymized images in this manuscript. The consent form is held in the patients' clinical notes and is available for review by the Editor-in-Chief.

### **Availability of data and materials**

The datasets analysed in the current study are available from the corresponding author upon reasonable request.

### **Competing interests**

The authors declare that they have no competing interests.

### **Funding**

The research was funded in part by the Swedish Research Council, Swedish Heart and Lung Foundation, the Stockholm County Council and Karolinska Institutet.

### **Author contributions**

ST contributed to design of the study, performed data acquisition, data analysis and wrote the manuscript. AS supervised the technical aspects of data acquisition. JGR, HE and PS participated in data acquisition and all authors substantially contributed to the interpretation of the results. MU designed the study, contributed to writing of the manuscript, and is overall guarantor of the scientific integrity of the study.

### **Acknowledgements**

We acknowledge the support provided by the CMR technologists at the Department of Clinical Physiology, Karolinska University Hospital. Karolinska University Hospital has a research and development agreement regarding CMR with Siemens Healthineers.

## References

1. Spodick DH. Macrophysiology, microphysiology, and anatomy of the pericardium: a synopsis. *Am Heart J*. 1992;124(4):1046–51.
2. Light RW. The Light Criteria. *Clin Chest Med*. 2013 Mar;34(1):21–6.
3. Cohen JM, Weinreb JC, Maravilla KR. Fluid collections in the intraperitoneal and extraperitoneal spaces: comparison of MR and CT. *Radiology*. 1985 Jun;155(3):705–8.
4. D T, U S, G de G, H S, Cb H. Evaluation of pleural and pericardial effusions by magnetic resonance imaging. *Eur J Radiol*. 1987 Aug;7(3):169–74.
5. Wall SD, Fisher MR, Amparo EG, Hricak H, Higgins CB. Magnetic resonance imaging in the evaluation of abscesses. *AJR Am J Roentgenol*. 1985 Jun;144(6):1217–21.
6. Terrier F, Revel D, Pajannen H, Richardson M, Hricak H, Higgins CB. MR imaging of body fluid collections. *J Comput Assist Tomogr*. 1986 Dec;10(6):953–62.
7. Brown JJ, vanSonnenberg E, Gerber KH, Strich G, Wittich GR, Slutsky RA. Magnetic resonance relaxation times of percutaneously obtained normal and abnormal body fluids. *Radiology*. 1985 Mar;154(3):727–31.
8. Baysal T, Bulut T, Gökirmak M, Kalkan S, Dusak A, Dogan M. Diffusion-weighted MR imaging of pleural fluid: differentiation of transudative vs exudative pleural effusions. *Eur Radiol*. 2004;14(5):890–6.
9. İnan N, Arslan A, Akansel G, Arslan Z, Eleman L, Demirci A. Diffusion-weighted MRI in the characterization of pleural effusions. *Diagn Interv Radiol*. 2009;15(1):13.
10. Karatag O, Alar T, Kosar S, Ocakoglu G, Yildiz Y, Gedik E, et al. Can diffusion weighted MRI differentiate between inflammatory-infectious and malignant pleural effusions? *J Belg Soc Radiol [Internet]*. 2015 [cited 2016 Jun 22];98(2). Available from: <http://www.jbsr.be/articles/10.5334/jbr-btr.767/>
11. Keskin Z, Yeşildağ M, Alkan E, Kayhan A, Tolu İ, Keskin S. Differentiation Between Transudative and Exudative Pleural Effusions by Diffusion Weighted Magnetic Resonance Imaging [Internet]. Vol. 16, *Iranian Journal of Radiology*. Kowsar; 2019 [cited 2020 Jul 15]. Available from: <https://sites.kowsarpub.com/iranjradiol/articles/78775.html>

12. Taylor AJ, Salerno M, Dharmakumar R, Jerosch-Herold M. T1 Mapping. *JACC Cardiovasc Imaging*. 2016 Jan;9(1):67–81.
13. Rosmini S, Seraphim A, Knott K, Brown JT, Knight DS, Zaman S, et al. Non-invasive characterization of pleural and pericardial effusions using T1 mapping by magnetic resonance imaging. *Eur Heart J Cardiovasc Imaging*. 2021 Jul 30;jeab128.
14. Kuetting D, Luetkens J, Faron A, Isaak A, Attenberger U, Pieper CC, et al. Evaluation of malignant effusions using MR-based T1 mapping. *Sci Rep*. 2021 Mar 29;11(1):7116.
15. Frola C, Cantoni S, Turtulici I, Leoni C, Loria F, Gaeta M, et al. Transudative vs exudative pleural effusions: differentiation using Gd-DTPA-enhanced MRI. *Eur Radiol*. 1997;7(6):860–4.
16. Messroghli DR, Greiser A, Fröhlich M, Dietz R, Schulz M, Menger J. Optimization and validation of a fully-integrated pulse sequence for modified look-locker inversion-recovery (MOLLI) T1 mapping of the heart. *J Magn Reson Imaging*. 2007;26(4):1081–6.
17. Xue H, Greiser A, Zuehlsdorff S, Jolly MP, Guehring J, Arai AE, et al. Phase-sensitive inversion recovery for myocardial T1 mapping with motion correction and parametric fitting. *Magn Reson Med*. 2013 May;69(5):1408–20.
18. Kellman P, Arai AE, Xue H. T1 and extracellular volume mapping in the heart: estimation of error maps and the influence of noise on precision. *J Cardiovasc Magn Reson*. 2013 Dec;15(1):56.
19. McKenna DA, Laxpati M, Colletti PM. The Prevalence of Incidental Findings at Cardiac MRI. *Open Cardiovasc Med J*. 2008 Apr 2;2:20–5.
20. Adler Y, Charron P, Imazio M, Badano L, Barón-Esquivias G, Bogaert J, et al. 2015 ESC Guidelines for the diagnosis and management of pericardial diseases. *Eur Heart J*. 2015 Nov 7;36(42):2921–64.
21. Messroghli DR, Moon JC, Ferreira VM, Grosse-Wortmann L, He T, Kellman P, et al. Clinical recommendations for cardiovascular magnetic resonance mapping of T1, T2, T2\* and extracellular volume: A consensus statement by the Society for Cardiovascular Magnetic Resonance (SCMR) endorsed by the European Association for Cardiovascular Imaging (EACVI). *J Cardiovasc Magn Reson [Internet]*. 2017 Dec [cited 2018 Aug 22];19(1). Available from: <https://jcmr-online.biomedcentral.com/articles/10.1186/s12968-017-0389-8>
22. Chow K, Flewitt JA, Green JD, Pagano JJ, Friedrich MG, Thompson RB. Saturation recovery single-shot acquisition (SASHA) for myocardial T(1) mapping. *Magn Reson Med*. 2014 Jun;71(6):2082–95.
23. Piechnik SK, Ferreira VM, Dall'Armellina E, Cochlin LE, Greiser A, Neubauer S, et al. Shortened Modified Look-Locker Inversion recovery (ShMOLLI) for clinical myocardial T1-mapping at 1.5 and 3 T within a 9 heartbeat breathhold. *J Cardiovasc Magn Reson*. 2010;12(1):69.

24. Weingärtner S, Akcakaya M, Berg S, Kissinger KV, Manning WJ, Nezafat R. Heart-rate independent myocardial T1-mapping using combined saturation and inversion preparation pulses. *J Cardiovasc Magn Reson*. 2013 Jan 30;15(Suppl 1):P46.
25. Kellman P, Hansen MS. T1-mapping in the heart: accuracy and precision. *J Cardiovasc Magn Reson*. 2014;16(1):2.

**Table 1. Baseline variables for healthy volunteers**

| Characteristic                     |            |
|------------------------------------|------------|
| Reliably measurable T1, n/n (%)    | 26/30 (87) |
| Female sex, n/n (%)                | 12/26 (46) |
| Age, years                         | 35 [46-65] |
| Height, cm                         | 174±10     |
| Weight, kg                         | 71±12      |
| Body mass index, kg/m <sup>2</sup> | 22±2       |
| Body surface area, m <sup>2</sup>  | 1.8±0.2    |

Data are presented as numbers (n) and percent, mean±SD, or median [interquartile range].

**Figure 1.** An example of native T1 maps taken in short axis (left) and perpendicular (right) slice orientations.
